# Supplementary material
Source: publisher figshare collection journal article supplement (https://springernature.figshare.com/ndownloader/files/15481094)
Supplement: Supplementary file 1 [file 15481094]

## Sheet: Table S2
Table S2 δ13C and δ18Ο values, AFRs (altered fiber ratios), and AF-PCRs (altered fiber and puncta-filling cement ratios) of the fossil Terebratalia coreanica (MNTCo1–5) and Laqueus rubellus (MNLR1–5) shells
Sample No.	Interval	Distance from the posterior shell edge (mm)	δ13C (‰VPDB)	δ18O (‰VPDB)	Altered Fiber Ratio (AFR: %)	Altered fiber and puncta-filling cement ratio (AF-PCR: %)		Sample No.	Interval	Distance from the posterior shell edge (mm)	δ13C (‰VPDB)	δ18O (‰VPDB)	Altered Fiber Ratio (AFR: %)	Altered fiber and puncta-filling cement ratio (AF-PCR: %)
MNTCo1-1	1	0.789245	-0.355434	0.941617				MNLR1-1	1	0.821656	1.18155	2.0939
MNTCo1-2	1	1.18197	-0.24947	1.41994				MNLR1-2	1	1.58628	-0.967	1.14045
MNTCo1-3	1	2.10094	-0.522959	1.34571				MNLR1-3	1	2.39693	0.0038349	1.19137
MNTCo1-4	1	2.94967	-0.776264	1.35258				MNLR1-4	1	3.2791	-0.0768998	1.65436
MNTCo1-5	1	3.99819	-0.355434	1.71346				MNLR1-5	1	4.33005	0.132001	1.77749
MNTCo1-6	1	4.89037	-0.631951	1.98011				MNLR1-6	1	5.41179	0.162277	1.80896
MNTCo1-7	1	5.94025	-0.183873	2.17548				MNLR1-7	1	6.52142	0.969624	1.72891
MNTCo1-8	1	7.08456	-0.462408	2.06035				MNLR1-8	1	7.52953	0.426683	1.41182
MNTCo1-9	1	8.14548	-1.64416	1.64844				MNLR1-9	1	8.53754	1.41972	1.85092
MNTCo1-10	1	9.18314	-2.0216	0.225112				MNLR1-10	1	9.60423	1.55091	1.69747
MNTCo1-11	1	10.2123	-1.94086	-0.418065				MNLR1-11	1	10.7022	1.16238	1.62678
MNTCo1-12	1	11.1414	-1.01342	-0.0657072				MNLR1-12	1	11.7003	1.31779	1.5601
MNTCo1-13	1	12.1659	0.403472	0.584249				MNLR1-13	1	12.7713	1.85064	1.96876
MNTCo1-14	1	13.3836	1.69321	1.43206				MNLR1-14	1	13.8606	2.11707	1.88764
MNTCo1-15	1	14.5272	1.59734	1.23752				MNLR1-15	2	14.8472	2.38652	2.08532	0	2.07509
MNTCo1-16	2	15.6594	2.40166	2.07226				MNLR1-16	2	15.8418	1.93037	2.1717
MNTCo1-17	2	16.8653	2.09587	2.12983	0	2.17653		MNLR1-17	2	17.3128	1.89303	2.32617	6.76162	8.00307
MNTCo1-18	2	18.0719	2.1211	2.07127				MNLR1-18	3	19.2339	1.94752	2.37003
MNTCo1-19	2	19.2538	2.1322	2.05538				MNLR2-1	1	0.806888	0.0646887	1.04705
MNTCo1-20	3	20.9486	0.83843	1.90452	14.6574	17.8582		MNLR2-2	1	1.66173	-1.40973	0.737175
MNTCo1-21	3	22.6773	-0.170754	1.292				MNLR2-3	1	2.87663	-0.914219	0.817396
MNTCo1-22	3	24.9229	-0.334242	0.86738	92.3921	95.0815		MNLR2-4	1	3.98431	-0.949541	1.09056
MNTCo1-23	3	26.9739	-2.97528	-0.213001				MNLR2-5	1	5.05972	-1.16954	0.830571
MNTCo1-24	3	28.7977	1.42376	1.76238				MNLR2-6	1	5.94507	-0.393481	1.26489
MNTCo1-25	3	30.4996	1.7033	1.99607	0	4.36124		MNLR2-7	1	7.07498	0.875063	1.31011
MNTCo1-26	3	32.8996	1.65284	1.76258				MNLR2-8	1	8.14821	1.22121	1.39902
MNTCo2-1	1	0.688388	-1.50187	0.86829				MNLR2-9	1	9.23147	0.591482	1.19087
MNTCo2-2	1	1.72348	-1.21223	1.02761				MNLR2-10	1	10.4176	1.34635	1.13132
MNTCo2-3	1	2.7619	-0.49672	1.30898				MNLR2-11	1	11.5235	1.50883	1.30303
MNTCo2-4	1	3.99081	-1.12342	1.10849				MNLR2-12	1	12.687	1.74296	1.78739
MNTCo2-5	1	5.15789	0.299526	1.41577				MNLR2-13	2	13.9172	2.077	1.78144
MNTCo2-6	1	6.34921	0.149157	1.31196				MNLR2-14	2	15.1735	1.46241	1.72784	0	1.62414
MNTCo2-7	1	7.40351	-2.29912	0.507904				MNLR2-15	2	16.5471	-0.256232	0.906998
MNTCo2-8	1	8.47911	-1.79756	0.608558				MNLR2-16	3	18.4294	0.573317	1.43505	24.243	30.3429
MNTCo2-9	1	9.63033	-1.1315	0.687943				MNLR2-17	3	20.5824	-1.18771	0.454064
MNTCo2-10	1	10.7987	1.29761	1.24248				MNLR2-18	3	22.8592	-0.0574225	0.878111	17.2848	24.0213
MNTCo2-11	1	11.9165	-0.74397	0.680695				MNLR2-19	3	25.0663	-0.412655	0.657889
MNTCo2-12	1	13.0029	0.891916	1.28417				MNLR2-20	3	27.1617	-1.51267	0.238933
MNTCo2-13	2	14.0764	1.16742	0.984417				MNLR3-1	1	0.715278	-1.13111	0.858565
MNTCo2-14	2	15.208	2.00404	1.36556	0	2.28983		MNLR3-2	1	1.6439	-3.57534	0.0891454
MNTCo2-15	2	16.523	2.15037	1.33677				MNLR3-3	1	2.70988	-3.22695	0.0305509
MNTCo2-16	2	17.8446	1.91725	1.48268	0	2.29998		MNLR3-4	1	3.87461	-0.11232	1.15831
MNTCo2-17	3	19.6303	0.638611	1.54074	11.1584	13.1219		MNLR3-5	1	4.97917	-0.657435	1.03624
MNTCo2-18	3	21.9486	0.325764	1.29685				MNLR3-6	1	6.1061	-0.0200022	1.34074
MNTCo2-19	3	23.9883	0.0583308	1.0489				MNLR3-7	1	7.32485	-0.323332	1.22701
MNTCo2-20	3	25.9407	0.225855	1.09859	32.5442	35.3891		MNLR3-8	1	8.43403	-0.895923	0.824591
MNTCo2-21	3	27.9215	0.649712	1.26877				MNLR3-9	1	9.61574	-1.27069	0.19031
MNTCo2-22	3	29.949	0.154203	0.970591				MNLR3-10	1	10.8792	0.88779	1.15117
MNTCo3-1	1	0.649503	-2.77748	0.573677				MNLR3-11	1	12.1701	1.23288	1.24347
MNTCo3-2	1	1.70822	0.159249	1.25679				MNLR3-12	1	13.4375	-0.2475	0.792566
MNTCo3-3	1	2.82114	-1.31719	1.17493				MNLR3-13	1	14.6223	1.89449	1.498
MNTCo3-4	1	3.95077	-0.350389	1.4086				MNLR3-14	2	15.9402	1.94065	1.53826
MNTCo3-5	1	5.01355	-0.0748814	1.62458				MNLR3-15	2	17.3785	2.41957	1.84959	0	1.72129
MNTCo3-6	1	6.07859	-0.828742	1.22175				MNLR3-16	2	18.6721	2.27036	1.67623
MNTCo3-7	1	7.18925	-0.811585	0.918908				MNLR3-17	3	20.0494	1.22959	1.56806	13.0644	18.1311
MNTCo3-8	1	8.36134	-0.349379	0.501042				MNLR3-18	3	22.0432	0.445983	1.29034
MNTCo3-9	1	9.63234	0.428701	0.655881				MNLR3-19	3	24.1003	0.71964	0.963792	19.9793	27.96
MNTCo3-10	1	10.808	1.21586	1.37435				MNLR3-20	3	26.13
MNTCo3-11	1	12.0063	1.42779	1.30555				MNLR3-21	3	28.1246	0.589955	0.96122
MNTCo3-12	1	13.1405	1.02109	1.12933				MNLR3-22	3	30.2847	0.641609	0.9842	0	12.4153
MNTCo3-13	1	14.2611	1.5933	1.28913				MNLR4-1	1	0.586592
MNTCo3-14	2	15.4205	1.85165	1.35464				MNLR4-2	1	1.32123	-2.64628	0.289609
MNTCo3-15	2	16.6143	1.79715	1.3328	0	1.3989		MNLR4-3	1	2.0987	-0.62085	0.931607
MNTCo3-16	2	17.8053	1.66091	1.33777				MNLR4-4	1	2.97952	-1.6704	0.720736
MNTCo3-17	2	19.0045	0.594207	0.934789				MNLR4-5	1	4.05959	-0.698557	1.25759
MNTCo3-18	2	20.201	1.97982	1.6266	0	2.41682		MNLR4-6	1	5.14991	-0.353416	1.30665
MNTCo3-19	2	21.4187	1.55899	1.64305				MNLR4-7	1	6.24069	-1.68453	0.999358
MNTCo3-20	3	23.0632	0.464023	1.36285				MNLR4-8	1	7.27747	-1.65324	0.693702
MNTCo3-21	3	25.2565	-3.31032	0.100426	24.6515	27.1551		MNLR4-9	1	8.32588	-2.05692	0.371315
MNTCo3-22	3	27.4332	-1.22838	0.629492				MNLR4-10	1	9.41341	-1.35453	0.840512
MNTCo3-23	3	29.5483	-0.198002	0.909352				MNLR4-11	1	10.5377	-2.3072	0.459764
MNTCo3-24	3	31.5614	-0.650116	0.868214	15.4453	20.0983		MNLR4-12	1	11.6406	-1.19407	0.87426
MNTCo3-25	3	33.4571	-2.0105	0.322129				MNLR4-13	1	12.7896	0.422646	1.23057
MNTCo4-1	1	0.640594	-0.337269	1.0531				MNLR4-14	2	13.933	-0.0224039	1.36953
MNTCo4-2	1	1.6203	0.181451	1.03263				MNLR4-15	2	15.054	-0.226259	1.18711	0	1.73248
MNTCo4-3	1	2.68366	0.555858	1.46696				MNLR4-16	2	16.2146	0.835402	1.5462
MNTCo4-4	1	3.8703	0.418609	1.56506				MNLR4-17	2	17.4041	1.80725	1.83802	0	1.31017
MNTCo4-5	1	4.97921	-0.310021	1.59676				MNLR4-18	2	18.5205	1.87385	1.9998
MNTCo4-6	1	6.08465	-1.75618	0.154902				MNLR4-19	3	20.1546	0.584115	1.66371
MNTCo4-7	1	7.2599	-0.495711	-0.10018				MNLR4-20	3	22.4292	-2.81986	0.527808	39.0632	39.7676
MNTCo4-8	1	8.37277	-1.35856	-0.25612				MNLR4-21	3	24.7756	-1.48976	0.825806
MNTCo4-9	1	9.52277	-0.250479	0.415057				MNLR4-22	3	26.8906
MNTCo4-10	1	10.5307	0.649712	0.597508				MNLR5-1	1	0.60545	0.160258	1.36961
MNTCo4-11	1	11.5851	-0.012312	0.149448				MNLR5-2	1	1.48736	0.62751	1.78221
MNTCo4-12	2	12.6431	0.750631	0.685277				MNLR5-3	1	2.48144	-1.69361	0.828583
MNTCo4-13	2	13.5119	1.27541	1.10741				MNLR5-4	1	3.54897	-0.00121102	1.46687
MNTCo4-14	2	14.497	2.42688	1.71606	0	1.49584		MNLR5-5	1	4.66509	0.135029	1.48471
MNTCo4-15	2	15.4238	2.41377	1.89151	0	2.27609		MNLR5-6	1	5.7579	0.33081	1.76454
MNTCo4-16	2	16.4495	2.37542	1.8545				MNLR5-7	1	6.89336	0.137047	1.05016
MNTCo4-17	2	17.5886	2.08275	1.90813	0	6.00989		MNLR5-8	1	8.02133	2.06156	1.41916
MNTCo4-18	2	18.6604	0.319709	1.60759				MNLR5-9	1	9.15837	1.13816	1.00322
MNTCo4-19	2	19.7441	0.390352	1.65861				MNLR5-10	1	10.1844	0.178424	0.630983
MNTCo4-20	2	20.6985	-0.0324957	1.60177				MNLR5-11	1	11.2425	1.84963	1.16605
MNTCo4-21	2	21.6767	0.129983	1.43282				MNLR5-12	1	12.3404	1.95761	1.51643
MNTCo4-22	3	23.0584	0.135029	1.53372	4.09396	7.2646		MNLR5-13	1	13.5229	2.06156	1.9226
MNTCo4-23	3	24.9178	0.542739	1.3962				MNLR5-14	2	14.6742	2.22606	2.05017
MNTCo4-24	3	26.8896	0.313654	1.25319				MNLR5-15	2	15.8081	2.19275	1.99923
MNTCo4-25	3	28.9777	-0.0950651	1.06043	16.735	26.039		MNLR5-16	2	16.891	2.12514	2.03565	0	2.33394
MNTCo5-1	1	0.788218	-1.89141	0.907008				MNLR5-17	2	17.936	2.03229	2.06871
MNTCo5-2	1	2.03651	0.0280553	1.4279				MNLR5-18	2	18.9814	1.59935	2.1157
MNTCo5-3	1	3.17916	-0.58351	1.07672				MNLR5-19	2	20.0778	0.114845	1.20777
MNTCo5-4	1	4.29114	-0.0950651	1.30571				MNLR5-20	2	21.19	0.295489	1.23675	0	3.36464
MNTCo5-5	1	5.40214	-0.230296	1.35157				MNLR5-21	2	22.2954	0.465032	1.22808
MNTCo5-6	1	6.4591	0.0906247	1.74545				MNLR5-22	2	23.4218	-1.14663	0.555008
MNTCo5-7	1	7.60321	-0.0213947	1.82571				MNLR5-23	3	24.9803	-1.86517	0.307424	19.5307	25.464
MNTCo5-8	1	8.81159	-0.179837	1.74763				MNLR5-24	3	27.0596	0.179433	1.09949
MNTCo5-9	1	10.0497	-0.893329	1.48758				MNLR5-25	3	29.408	1.06651	1.43664
MNTCo5-10	1	11.369	0.842466	0.879549
MNTCo5-11	1	12.7512	0.0532849	0.405261
MNTCo5-12	1	13.8934	1.41467	1.28909
MNTCo5-13	1	14.9966	1.63568	1.41694
MNTCo5-14	1	16.149	2.08477	1.79202
MNTCo5-15	2	17.4036	2.09486	1.66689	0	2.21653
MNTCo5-16	2	18.6865	2.14443	1.94993
MNTCo5-17	2	19.7848	1.5388	1.71496
MNTCo5-18	2	20.9426	1.66697	1.8639
MNTCo5-19	2	22.11	1.77798	1.97453
MNTCo5-20	2	23.0735	1.21788	1.81005
MNTCo5-21	2	23.9508	-0.0102937	0.991453	23.8301	25.4633
MNTCo5-22	2	24.9722	0.497326	1.23751
MNTCo5-23	2	26.1324	1.05339	1.43028
MNTCo5-24	2	27.1835	0.457968	1.14654
MNTCo5-25	2	28.3354	1.07559	1.45277	7.27248	13.3711
MNTCo5-26	3	30.0492	1.18963	1.61207
MNTCo5-27	3	32.2274	0.268241	1.33412	13.0337	16.5392
MNTCo5-28	3	34.2639	0.815218	1.52891
MNTCo5-29	3	36.0414	0.82632	1.57181	0	2.87372
